# Supplementary material
Source: publisher figshare collection journal article supplement (https://acs.figshare.com/ndownloader/files/20180909)
Supplement: Supplementary file 1 [file 20180909]

Compound	SMILES	NO inhibition (%)	Affinity	Cholesterol efflux (%)
1	O=C([C@@H](NC([C@H](C)N([H])C([C@@H](CC1=CNC2=C1C=CC=C2)N([H])C3=O)=O)=O)CC4=CNC5=C4C=CC=C5)N[C@H](CC6=CC=CC=C6)C(N([H])[C@@H](CCCCN(CC=C)CC#CCN3NC([C@@H](N)C)=O)C(N)=O)=O	45	0.08 µM	11
2	O=C([C@@H](NC([C@H](C)N(C(N1NC([C@@H](N)C)=O)=O)[H])=O)CC2=CNC3=C2C=CC=C3)N[C@H](CC4=CC=CC=C4)C(N([H])[C@@H](CCCCN(CC=C)CC#CC1)C(N)=O)=O	29	0.24 µM	6
R-8	O=C(N[C@H](CC1=CC=CC=C1)C(N[C@@H]2C(N)=O)=O)[C@H](CC3=CNC4=C3C=CC=C4)NC([C@@H](NC([C@@H](CC5=CNC6=C5C=CC=C6)NC([C@H](NC([C@@H](N)C)=O)CC#CCN(CC=C)CCCC2)=O)=O)C)=O	10	1.04 µM	6
S-8	O=C(N[C@H](CC1=CC=CC=C1)C(N[C@@H]2C(N)=O)=O)[C@H](CC3=CNC4=C3C=CC=C4)NC([C@@H](NC([C@@H](CC5=CNC6=C5C=CC=C6)NC([C@@H](NC([C@@H](N)C)=O)CC#CCN(CC=C)CCCC2)=O)=O)C)=O	17	0.66 µM	7
R-9	O=C(N[C@@H](CCCCN(CC=C)CC#CC1)C(N)=O)[C@@H](CC2=CC=CC=C2)NC([C@@H](NC([C@H](C)NC([C@@H]1NC([C@@H](N)C)=O)=O)=O)CC3=CNC4=C3C=CC=C4)=O	9	0.24 µM	6
S-9	O=C(N[C@@H](CCCCN(CC=C)CC#CC1)C(N)=O)[C@@H](CC2=CC=CC=C2)NC([C@@H](NC([C@H](C)NC([C@H]1NC([C@@H](N)C)=O)=O)=O)CC3=CNC4=C3C=CC=C4)=O	16	1.47 µM	13
10	O=C([C@@H](NC([C@H](C)N([H])C([C@@H](CC1=CNC2=C1C=CC=C2)N([H])C3=O)=O)=O)CC4=CNC5=C4C=CC=C5)N[C@H](CC6=CC=CC=C6)C(N([H])[C@@H](CCCCN(CC=C)CC#CCN3N)C(N)=O)=O	18	ND	-
11	O=C([C@@H](NC([C@H](C)N([H])C([C@@H](CC1=CNC2=C1C=CC=C2)N([H])C3=O)=O)=O)CC4=CNC5=C4C=CC=C5)N[C@H](CC6=CC=CC=C6)C(N([H])[C@@H](CCCCN(CC=C)CC#CCN3NC([C@@H](NC(C)=O)C)=O)C(N)=O)=O	20	0.67 µM	17
